# Supplementary material for: The cAMP Inducers Modify N-Acetylaspartate Metabolism in Wistar Rat Brain
Source: MDPI journal article supplement (doi:10.3390/antiox10091404), 2021-09-01

**Suppl. 1****Table S1.** A list of compounds used in this study.

| NAME                                              | COMPANY         | Cat#         |
|---------------------------------------------------|-----------------|--------------|
| 1,4-bis(5-phenyloxazol-2-yl) benzene (POPOP)      | Sigma Aldrich   | P3754        |
| 1,4-Dioxan                                        | Sigma Aldrich   | 292300119    |
| 2-Chloroacetamide                                 | Sigma Aldrich   | C0267        |
| 2-Thiobarbituric acid (TBA)                       | Sigma Aldrich   | T5500        |
| 2,5-Diphenyloxazole (PPO)                         | Sigma Aldrich   | D210404      |
| 4-Ethynylpyridine hydrochloride                   | Sigma Aldrich   | 530921       |
| 4-Nitrophenyl phosphate disodium salt hexahydrate | Sigma Aldrich   | 71768        |
| 6-Carboxyfluorescein diacetate (6-CFDA)           | Sigma Aldrich   | C5041        |
| Acetic acid                                       | POCH            | 568760114    |
| Acetonitrile                                      | POCH            | 10265456     |
| Acetyl-CoA [acetyl-1-14-C] 50 $\mu$ Ci            | Perkin Elmer    | NEC313050UC  |
| Adenosine                                         | Sigma Aldrich   | A4036        |
| ADP sodium salt                                   | Sigma Aldrich   | A6646        |
| Alcohol dehydrogenase (ADH)                       | Sigma Aldrich   | A7011        |
| Albumin, bovine serum (BSA)                       | Sigma Aldrich   | A4503        |
| AraC                                              | Sigma Aldrich   | C6645        |
| Aspartic acid L-[U-14-C] 50 $\mu$ Ci              | Perkin Elmer    | NEC268E050UC |
| ATP disodium salt                                 | Sigma Aldrich   | A2383        |
| $\beta$ -hydroxybutyrole dehydrogenase            | Sigma Aldrich   | H9408        |
| B27 supplement                                    | ThermoFisher Sc | 17504044     |
| Basic fibroblast growth factor (bFGF)             | ThermoFisher Sc | 13256-029    |
| BCIP                                              | Sigma Aldrich   | B6149        |
| Boric acid                                        | POCH            | 531360115    |
| Brilliant blue G                                  | Sigma Aldrich   | 27815        |
| CHAPS                                             | Sigma Aldrich   | C9426        |
| Choline chloride                                  | Sigma Aldrich   | C7527        |
| <i>cis</i> -Aconitic acid                         | Sigma Aldrich   | A3412        |
| Citrate lyase (CL)                                | Sigma Aldrich   | C0897        |
| Citrate synthase (CS)                             | Sigma Aldrich   | C3260        |

|                                           |                 |            |
|-------------------------------------------|-----------------|------------|
| Citrate sodium dibasic                    | Sigma Aldrich   | 71635      |
| Citric acid                               | Sigma Aldrich   | C1909      |
| Coenzyme A sodium salt (CoA)              | Sigma Aldrich   | C3144      |
| D-Glucose                                 | Sigma Aldrich   | G5767      |
| Diaminofluorescein-2 diacetate (DAF-2 DA) | Calbiochem      | 251505-M   |
| DAPI                                      | Sigma Aldrich   | D8417      |
| Dibutyl-cAMP                              | Sigma Aldrich   | D0627      |
| Diethyl ether                             | Sigma Aldrich   | 309966     |
| Diphenyloxazole                           | Sigma Aldrich   | D210404    |
| Dithiothreitol (DTT)                      | Sigma Aldrich   | D9779      |
| DMEM/F12 + Glutamax                       | ThermoFisher Sc | 31331-028  |
| DMF                                       | Sigma Aldrich   | D4551      |
| DTNB                                      | Sigma Aldrich   | D8130      |
| EDTA                                      | Sigma Aldrich   | E1644      |
| Epidermal growth factor (EGF)             | VWR             | BDAA354010 |
| Eserine salicylate salt                   | Sigma Aldrich   | 45720      |
| Ethanol                                   | Sigma Aldrich   | 493511     |
| Forskolin                                 | Sigma Aldrich   | F3917      |
| Glucose-6-phosphate dehydrogenase (G6PDH) | Sigma Aldrich   | G8404      |
| Glutamax                                  | ThermoFisher Sc | 3505006    |
| Glutamic-Oxalacetic Transaminase (GOT)    | Sigma Aldrich   | G2751      |
| Glutathione (oxidized)                    | Sigma Aldrich   | G6654      |
| Glutathione (reduced)                     | Sigma Aldrich   | G6529      |
| Glycerol                                  | Sigma Aldrich   | G2025      |
| Glycine                                   | Sigma Aldrich   | G8898      |
| H <sub>3</sub> PO <sub>4</sub>            | Sigma Aldrich   | 79617      |
| HBSS                                      | ThermoFisher Sc | 4442135    |
| HCl                                       | POCH            | 575283721  |
| HClO <sub>4</sub>                         | Fluka           | 77228      |
| HEPES                                     | Sigma Aldrich   | H4034      |
| HEPES buffer                              | ThermoFisher Sc | 15630-056  |
| HEPES sodium salt                         | Sigma Aldrich   | H3784      |

|                                                   |                 |           |
|---------------------------------------------------|-----------------|-----------|
| IgG standard (from human serum)                   | Sigma Aldrich   | I4506     |
| Isocitrate trisodium salt                         | Sigma Aldrich   | I1252     |
| Isocitrate dehydrogenase (IDH)                    | Sigma Aldrich   | I2002     |
| $\alpha$ -Ketoglutarate disodium salt             | Sigma Aldrich   | 75892     |
| KCl                                               | POCH            | 739740114 |
| K <sub>2</sub> HPO <sub>4</sub>                   | Sigma Aldrich   | P5504     |
| KH <sub>2</sub> PO <sub>4</sub>                   | Sigma Aldrich   | P5655     |
| K <sub>3</sub> PO <sub>4</sub>                    | POCH            | 742020112 |
| KHCO <sub>3</sub>                                 | Sigma Aldrich   | 237205    |
| KOH                                               | Sigma Aldrich   | P5958     |
| $\alpha$ -Ketoglutarate                           | Sigma Aldrich   | 75892     |
| L-Aspartate                                       | Sigma Aldrich   | A6683     |
| L-Glutamate                                       | Sigma Aldrich   | G5889     |
| L-Glutamine                                       | Sigma Aldrich   | G8540     |
| Lactic dehydrogenase (LDH)                        | Sigma Aldrich   | L-2500    |
| Laemmli Sample Buffer                             | Bio-Rad         | 161-0737  |
| Laminin                                           | ThermoFisher Sc | 23017015  |
| Lithium potassium acetyl phosphate                | Sigma Aldrich   | 0,1409    |
| Maleic anhydride                                  | Fluka           | 63200     |
| Malic acid                                        | Sigma Aldrich   | M1000     |
| Malate dehydrogenase (MDH)                        | Sigma Aldrich   | M2634     |
| <i>meta</i> -Phosphoric acid (MPA)                | Sigma Aldrich   | M6288     |
| Methanol                                          | Sigma Aldrich   | 621995156 |
| MgCl <sub>2</sub>                                 | Sigma Aldrich   | M8266     |
| MOPS                                              | Sigma Aldrich   | M1254     |
| Methylthiazolyldiphenyl-tetrazolium bromide (MTT) | Sigma Aldrich   | M2128     |
| <i>N</i> -acetylaspartate (NAA)                   | Sigma Aldrich   | A5625     |
| NaCl                                              | POCH            | 794121116 |
| NAD                                               | Sigma Aldrich   | N3014     |
| NADH                                              | Sigma Aldrich   | N8129     |
| NADP                                              | Sigma Aldrich   | N5755     |
| NADPH                                             | Sigma Aldrich   | N1630     |

|                                      |                 |          |
|--------------------------------------|-----------------|----------|
| NaOH                                 | Sigma Aldrich   | S8045    |
| Nerve growth factor (NGF- $\beta$ )  | Sigma Aldrich   | SRP4304  |
| Neurobasal Media                     | ThermoFisher Sc | 21103049 |
| NH <sub>4</sub> Cl                   | Sigma Aldrich   | A9434    |
| Nitrotetrazolium Blue chloride       | Sigma Aldrich   | N6876    |
| Paraformaldehyde                     | Sigma Aldrich   | 158127   |
| PBS (sterile buffer)                 | ThermoFisher Sc | 14190086 |
| Penicillin-Streptomycin solution     | Sigma Aldrich   | P4333    |
| Phenazine methosulfate (PES)         | Sigma Aldrich   | P9625    |
| Phosphotransacetylase (PTA)          | Sigma Aldrich   | P2783    |
| Poly-L-ornithine                     | Sigma Aldrich   | P4957    |
| Protease inhibitor cocktail          | Sigma Aldrich   | P8340    |
| SDS                                  | Sigma Aldrich   | L5750    |
| Sodium oxalate                       | Sigma Aldrich   | 71800    |
| Sodium phosphate                     | Sigma Aldrich   | S0876    |
| Sodium pyruvate                      | Sigma Aldrich   | P2256    |
| Streptozotocin                       | Sigma Aldrich   | S0130    |
| Sucrose                              | Sigma Aldrich   | S9378    |
| Ultrapure distilled water            | ThermoFisher Sc | 10977035 |
| Tetrabutylammonium bisulfate (TBAHS) | Sigma Aldrich   | 86853    |
| Tetraphenylborate sodium             | Sigma Aldrich   | T25402   |
| Theophylline                         | Sigma Aldrich   | T1633    |
| Thiamine hydrochloride               | Sigma Aldrich   | T4625    |
| Toluene                              | Sigma Aldrich   | 24529    |
| <i>trans</i> -retinoic acid          | Sigma Aldrich   | R2625    |
| TRIS Base                            | Sigma Aldrich   | 252859   |
| <i>bis</i> -TRIS                     | Sigma Aldrich   | B9754    |
| Triton X-100                         | Sigma Aldrich   | T8787    |
| Tween 20                             | Sigma Aldrich   | P9416    |

## Suppl. 2

The protocols for assays used in this study.

### Enzymatic assays

**Aconitase** (Aco, EC 4.2.1.3) activity was determined using NADPH / NADP conversion technique, at  $\lambda = 340$  nm and 37 °C. The reaction buffer contained 0.05 M Tris-HCl (pH = 7.4), 2 mM MgCl<sub>2</sub>, 0.1 mM NADP, 1 U IDH-NADP and 100 µg of cell homogenate protein in a final volume of 0.7 mL. Enzymatic assay was initiated by the addition of 10 µL of 10 mM *cis*-aconitane (10 µL) [17-18].

**Aspartate aminotransferase** (GOT, EC 2.6.1.1) activity was determined using DTNB / TNB reduction technique, at  $\lambda = 412$  nm and 37 °C. 1 mL of reaction buffer contained 0.1 M Tris-HCl (pH = 8.3), 1 mM sodium-EDTA, 0.018 mM acetyl-CoA, 50 mM aspartate, 0.1 mM DTNB, 2U citrate synthase (SC, EC 4.1.3.7) and 20 µg of cell homogenate protein. Enzymatic assay was initiated by the addition of 10 µL of 0.1 mM  $\alpha$ -ketoglutarate [17-18].

**Aspartate N-acetyltransferase** (NAT8L, 2.3.1.17) activity was determined using radiochemical assay measures the level of produced [<sup>14</sup>C]-N-acetylaspartate (<sup>14</sup>C-NAA). The reaction buffer contained 10 mM potassium phosphate, 20 mM potassium-HEPES (pH = 7.1), 1 mM MgCl<sub>2</sub>, 200 µM acetyl-CoA, 50 µM aspartate, 1 µM L-[U-<sup>14</sup>C]aspartate and 100 µg of cell homogenate protein in a final volume of 0.2 mL (incubation conditions: 30 min, 37 °C, gentle shaking). Reaction was stopped by thermic shock (5 min, 80 °C) and dilution (1 mL of 5 mM potassium-HEPES, pH = 7.1). The final product (<sup>14</sup>C-NAA) was isolated at DSC-SAX-SPE column (Discovery, Cat# 52664-U). Mobile phases: equilibration (5 mL of methanol followed by 5 mL of water and finally 5 mL of 5 mM potassium-HEPES, pH = 7.1), wash 1 (2 mL of 5 mM potassium-HEPES, pH = 7.1), wash 2 (5 mL of 0.15 M NaCl), elution (5 mL of 0.3 M NaCl). The radioactivity of eluent (2 mL) was counted for 10 min in the presence of 10 mL Ultima Gold™ liquid scintillator (Perkin Elmer, Cat# 6013321). Total radioactivity of substrate (L-[U-<sup>14</sup>C]aspartate) has been measured in 1,4-dioxan-based scintillator instead [17-18].

**Choline acetyltransferase** (ChAT, EC 2.3.1.6) activity was determined using radiochemical assay to measure the level of produced [<sup>14</sup>C]-acetylcholine (<sup>14</sup>C-ACh). The reaction buffer contained 50 mM sodium phosphate buffer (pH = 7.4), 1 mM EDTA, 0.6 mM NaCl, 0.2 mM eserine, [1-<sup>14</sup>C]-acetyl-CoA (0.43 nmol / sample, 0.025 µCi), 0.05 M choline and 20 µg of cell homogenate protein in a final volume of 0.01 mL (incubation conditions: 30 min, 30 °C, gentle shaking).

Reaction was stopped by dilution in ice – cold buffer having 10 mM sodium phosphate buffer (pH = 7.4), 0.5% 4-tetraphenylborate sodium, 25% acetonitrile in total volume of 6 mL. Finally, radioactive <sup>14</sup>-C ACh has been extracted in POPOP / PPO / toluene liquid scintillator and measured for 10 min. Total

radioactivity of substrate ([1-<sup>14</sup>C]-acetyl-CoA) has been measured in 1,4-dioxan-based scintillator instead [17-18].

**Citrate synthase** (SC, EC 4.1.3.7) activity was determined using DTNB / TNB reduction technique, at  $\lambda$  = 412 nm and 37 °C. 1 mL of reaction buffer contained 0.1 M Tris-HCl (pH = 8.0), 0.015 mM acetyl-CoA, 0.2 mM DTNB and 20 µg of cell homogenate protein. Enzymatic assay was initiated by the addition of 10 µL of 0.2 mM oxaloacetate [17-18].

**Isocitrate dehydrogenase** (IDH, EC 1.1.1.42) activity was determined using NADPH / NADP conversion technique, at  $\lambda$  = 340 nm and 37 °C. The reaction buffer contained 0.05 M Tris-HCl (pH = 7.4), 0.6 mM MgCl<sub>2</sub>, 0.5 mM NADP and 100 µg of cell homogenate protein in a final volume of 0.7 mL. Enzymatic assay was initiated by the addition of 10 µL of 10 mM isocitrate [17-18].

**Lactate dehydrogenase or LDH in media assay** (LDH, EC 1.1.1.27) activity was determined using NADH / NAD conversion technique, at  $\lambda$  = 340 nm and 37 °C. 1 mL of reaction buffer contained 0.1 M Tris-HCl (pH = 7.4), 0.2 mM NADH and 20 µg of cell homogenate protein (or 0 – 200 µL of culture media, for cell viability test assay). Enzymatic assay was initiated by the addition of 10 µL of 0.1 M pyruvate. To establish total LDH in media activity, Triton X-100 in final concentration 0.2% was added to two culture dishes with untreated cells. Dishes were incubated for the additional 2 h in usual culture conditions. Eventually, LDH in media activity from each experimental time point was divided by total LDH activity and express as a per cents of total LDH activity [17].

**Pyruvate dehydrogenase** (PDHC, EC 1.2.4.1.) activity was determined using cycling method [28]. In each lysate (100 µg of cell homogenate protein) the following reactions were performed: (1) citrate production, (2) citrate level measurement. The first reaction (1) was carried out in 250 µL for 30 min (37 °C, gentle shaking), buffer contained 0.1 M Tris-HCl (pH = 8.3), 2 mM MgCl<sub>2</sub>, 10 mM dithiothreitol, 10 mM pyruvate, 2 mM thiamine pyrophosphate, 0.2 mM CoA, 2.5 mM oxaloacetate, 2 mM NAD, 0.15 U citrate synthase (EC 4.1.3.7). Reaction was terminated by thermic shock (10 min, 100 °C). Finally, the produced citrate level was determined using NADH / NAD conversion technique, at  $\lambda$  = 340 nm and 37 °C. The reaction buffer contained 0.1 M Tris-HCl (pH = 7.4), 0.1 mM NADH, 0.2 U malate dehydrogenase (EC 1.1.1.37) and 100 µL of achieved supernatant in a final volume of 0.7 mL. The assay was initiated by the addition of 10 µL of 0.1 U citrate lyase (EC 4.1.3.6) [17-18].

### Metabolic assays

**Acetyl-CoA** level was determined using cycling method described previously [29]. In each neutralized supernatant (40 µg of cell homogenate protein) the following reactions were performed: (1) coenzyme-A removal, (2) acetyl-CoA level enhancement, (3) citrate level measurement. The first reaction (1) was carried out in 50 µL for 2 h (room temperature, gentle shaking), this reaction buffer contained 0.1 M

Tris-HCl (pH = 7.4), 1 mM maleic anhydride (dissolved in diethyl ether). The second reaction was started by the addition of 50  $\mu$ L of second reaction buffer (50 mM Tris-HCl (pH = 7.4), 5 mM  $\text{NH}_4\text{Cl}$ , 0.01% albumin, 1.2 mM oxaloacetate, 2 mM acetyl phosphate, 1U phosphotransacetylase 0.12U citrate synthase). The 100 min lasting reaction (30  $^{\circ}\text{C}$ , gentle shaking) was terminated by thermic shock (10 min, 100  $^{\circ}\text{C}$ ). Finally, the produced citrate level was determined using NADH / NAD conversion technique, at  $\lambda = 340$  nm and 37  $^{\circ}\text{C}$ . The reaction buffer contained 0.1 M Tris-HCl pH = 7.4, 0.1 mM NADH, 0.2U MDH and achieved supernatant in a final volume of 0.7 mL. Reaction was initiated by the addition of 10  $\mu$ L of 0.1 U citrate lyase (EC 4.1.3.6) [17-18].

**Aspartate** level was determined using NADH / NAD conversion technique, at  $\lambda = 340$  nm and 37  $^{\circ}\text{C}$ . The reaction buffer contained 70 mM sodium / potassium-phosphate buffer (pH = 7.2), 10 mM  $\alpha$ -ketoglutarate, 0.2 mM NADH and 100  $\mu$ g of cell homogenate protein in a final volume of 0.7 mL. Reaction was initiated by the 10  $\mu$ L addition of 15 U MDH and 0.6 U GOT [17-18].

**ATP, ADP, AMP and adenosine** levels were assayed by RP-HPLC method [31]. Briefly, supernatant (pH = 7.0) was centrifuged at Micro Spin filter (Teflon membrane,  $\varnothing$  0.22 mm, CISO, Cat# CIPT-02). 25  $\mu$ L of supernatant (50  $\mu$ g of cell homogenate protein) was analyzed in a pre-column protected Hypersil<sup>TM</sup> ODS C18RP column (150 x 4.6, i.d., MZ-Analysentechnik GmbH, Cat# 6045) by Flexar HPLC system (Perkin Elmer). Mobile phase A (10mM TBAHS / 100mM phosphate buffer, pH = 7.0) and mobile phase B (30% methanol) were mixed with flow rate: 1 mL/min under gradient program: 0 – 10 min (98% mobile phase A), 10 – 25 min (linear gradient from 98% to 0% mobile phase A), 25 – 40 min (0% mobile phase A), 40 – 45 (linear gradient from 0% to 98% mobile phase A). Separation time:  $t_{\text{Adc}} = 8.5$  min,  $t_{\text{ADP}} = 20.0$  min,  $t_{\text{ATP}} = 22.0$  min [21].

**$\beta$ -hydroxybutyrate** level was determined using NADH / NAD conversion technique, at  $\lambda = 340$  nm and 37  $^{\circ}\text{C}$ . 1 mL of reaction buffer contained 0.08 M glycine-NaOH buffer (pH = 9.5), 0.2 mM NAD and 20  $\mu$ g of cell homogenate protein. Reaction was initiated by the addition of 10  $\mu$ L of 0.25 U  $\beta$ -hydroxybutyrate dehydrogenase [18].

**Lactate** level was determined using NADH / NAD conversion technique, at  $\lambda = 340$  nm and 37  $^{\circ}\text{C}$ . 1 mL of reaction buffer contained 0.08 M glycine-NaOH buffer (pH = 9.5), 0.2 mM NAD and supernatant (20  $\mu$ g of cell homogenate protein). Reaction was initiated by the addition of 10  $\mu$ L of 0.25 U lactate dehydrogenase [18].

**N-acetylaspargate** (NAA) level was assayed by HPLC method described previously [9]. Briefly, supernatant (pH = 2.5) was centrifuged at Micro Spin filter (Teflon membrane,  $\varnothing$  0.22 mm, CISO, Cat# CIPT-02). 90  $\mu$ L of supernatant (90  $\mu$ g of cell homogenate protein) was analyzed in a Synergy 4u Fusion RP 80A column (250 x 4.6, Phenomenex, Cat# 00G-4424-EO) by HPLC A-200 system (Perkin Elmer). The

assay was performed under isocratic conditions (mobile phase: 0.1%  $\text{H}_3\text{PO}_4$  / 1% methanol / water, pH = 2.5) with flow rate: 0.9 mL/min and separation time: 20 min;  $t_{\text{NAA}} = 7.0$  min ( $\lambda = 210$  nm) [17-18].

**NAD and NADH** levels were determined using MTT conversion technique, at  $\lambda = 570$  nm (room temperature). Supernatants obtained with 0.2 M KOH were considered as having only NADH, while deproteinized with 0.1 HCl were considered as a total amount of NAD (NAD+NADH). Hence, NAD was calculated as result of subtraction of NADH from total NAD level. The reaction buffer contained 0.1 M Tris-HCl buffer (pH = 7.4), 0.04 M EDTA, 1 mM MTT, 1 mM PES, 5 mM ethanol and supernatant (100  $\mu\text{g}$  of cell homogenate protein) in a final volume of 1 mL. Reaction was initiated by the addition of 10  $\mu\text{L}$  of 40 U alcohol dehydrogenases [18].

**Oxaloacetate and pyruvate** levels were determined using NADH / NAD conversion technique, at  $\lambda = 340$  nm and 37 °C. 1 mL of reaction buffer contained 0.1 M Tris-HCl (pH = 7.4), 3 mM sodium-EDTA, 0.2 mM NADH and supernatant (100  $\mu\text{g}$  of cell homogenate protein). Reaction was initiated by the addition of 10  $\mu\text{L}$  of 1.5 U MDH (for oxaloacetate assay) or 4U LDH (for pyruvate assay) [17-18].

**Thiobarbituric acid reactive substances (TBARS)** were used to track the lipid peroxidation products at  $\lambda = 535$  nm in room temperature. Briefly, 0.5 mg of cell homogenate protein was deproteinized by 10% trichloroacetic acid in a final volume of 0.6 mL (10 min, 4 °C, gentle shaking). Next, each sample was enriched by 0.2 mL of 2% thiobarbituric acid and heated for 20 min at 100 °C [17-18].

**Reduced (GSH) and oxidized (GSSG) glutathione** levels were determined using capillary zone electrophoresis technique described by Hempe et al. [32] with modifications. Briefly, brain tissue was homogenised in 5% *meta*-phosphoric acid (1:10, w/v) and centrifuged (15 min, 4 °C, 10 000  $\times$  g). The obtained lysates were kept at -20 °C until analysis. Each sample was diluted 10 times either with distilled water or with glutathione standards in final concentrations of 2  $\mu\text{M}$  (GSH) and 0.4  $\mu\text{mol}$  (GSSG). Electrophoresis was performed using P/ACE MDQ, fused silica capillary 75  $\mu\text{m}$  i.d. and 57 cm long (Beckman Coulter, Cat #338473) with running buffer containing 75 mM boric acid and 25 mM bis-Tris (pH = 7.8). Samples were loaded under 0.5 psi for 20 s and run at 20 kV (normal polarity, 20 °C, 10 min). Electropherograms were analysed using Karat 32.0 (Beckman Coulter). Migration time:  $t_{\text{GSH}} = 5.7$  min,  $t_{\text{GSSG}} = 6.1$  min ( $\lambda = 200$  nm)[22].

### **Proliferation and viability assays**

**6-CFDA test** was used to calculate the total number of cell bodies being at the bottom of fluorescence – dedicated black 96-well plate. Total fluorescence emitted by 6-CFDA membrane – permeable fluorescent dye was counted using  $\lambda_{\text{ex}} = 488$  nm,  $\lambda_{\text{em}} = 520$  nm. The cells were seeded as usually. As soon as the cell culture was completed, 100  $\mu\text{L}$  of fresh media with 2 mM Glutamax and 50  $\mu\text{M}$  6-CFDA only (without supplement or other factors) was added to each well followed by 1 h incubation in a standard



cell culture condition. Next, the wells were washed 3 times by sterile PBS. Finally, to measure the total fluorescence per each well, the cells were lysed for 15 min by lyses buffer containing 50 mM HEPES, 5 mM dithiothreitol, 0.1 mM EDTA and 0.1% CHAPS [24].

**DAF-2 AM intracellular nitric oxide test** was determined using diaminofluorescein-2 diacetate (DAF-2) membrane permeable fluorescent dye method with  $\lambda_{\text{ex}}=488$  nm,  $\lambda_{\text{em}}=520$  nm. The cells were seeded as usually, but we used fluorescence – dedicated black 96-well plates instead of regular ones. As soon as the cell culture was completed, 100  $\mu\text{L}$  of fresh media with 2 mM Glutamax and 2  $\mu\text{M}$  DAF-2 AM only (without supplement or other factors) was added to each well, followed by 1 h incubation at standard cell culture conditions. Next, the wells were washed 3 times with sterile PBS. Finally, to measure cellular nitric oxide linked with fluorescence dye, the cells were lysed for 15 min by lyses buffer containing 50 mM HEPES, 5 mM dithiothreitol, 0.1 mM EDTA and 0.1% CHAPS [26].

**xCELLigence Real Time** instrument (Roche Germany) using real time electrical impedance measurement showed the processes of well surface covering by the seeded cells. The monitoring time was 6 days with 10<sup>th</sup> min time lapses [29].

Changes in **acid phosphatase** activity were determined using *p*-nitrophenyl phosphate / *p*-nitrophenol conversion technique, at  $\lambda = 405$  nm. At 96 well plate, the 0.1 mL of reaction buffer contained 0.1 M sodium-citric buffer Tris-HCl (pH = 5.4), 5 mM *p*-nitrophenyl phosphate, 10  $\mu\text{g}$  of cell homogenate protein. Reaction was carried out for 1 h at 37°C [25].

**MTT test** was used to calculate proliferation as a total mitochondria activity. Cells were seeded at 48-well plates and cultured as usually. As soon as the cell culture was completed, 0.6 mL of fresh media with 2 mM Glutamax and 5 mg/mL MTT only (without supplement or other factors) was added to each well, followed by 3 h incubation in light – protected cell culture conditions. In order to dissolve the formed formazan, the cells were lysed by 0.3 mL of lysing buffer (50% DMF, 20% SDS, pH = 4.7, overnight). Finally, the formed formazan was monitored at 690 nm [28].

A NSC:  $\beta$ III tubulin GFAP DAPI

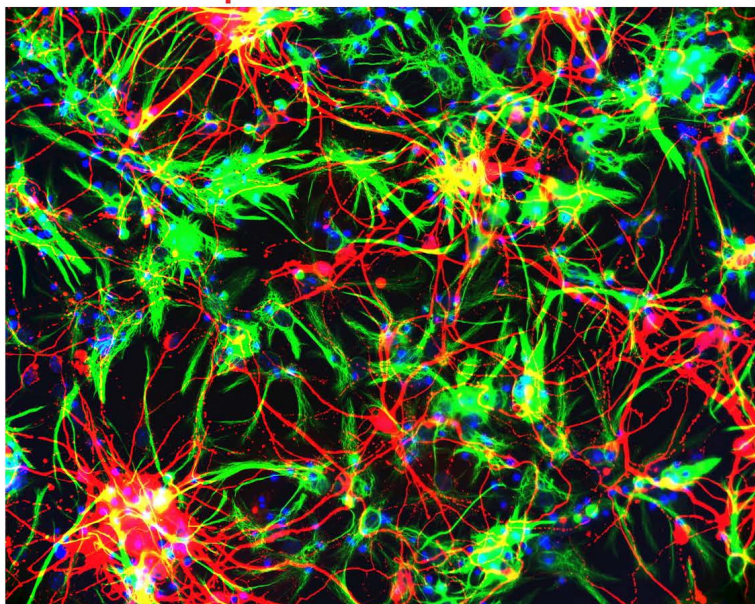

B NSC:  $\beta$ III tubulin CNPase DAPI

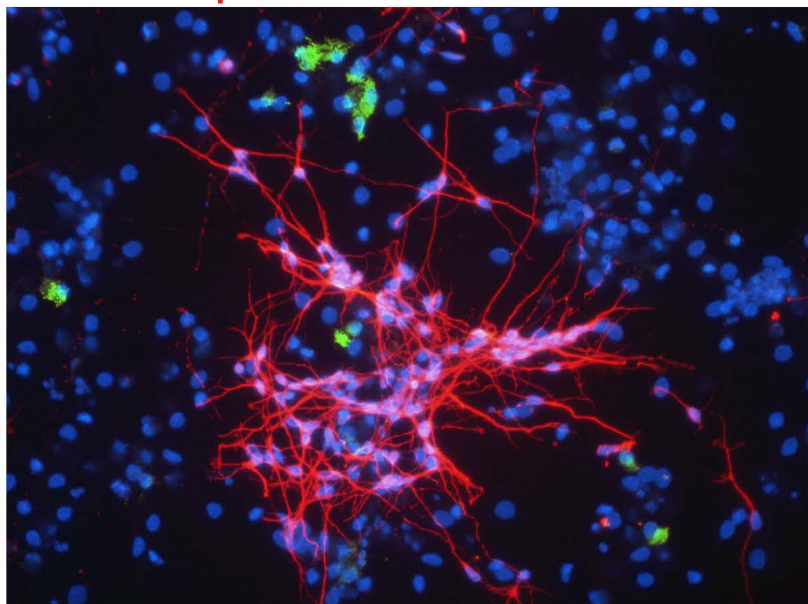

C NSC: Phalloidin GFAP

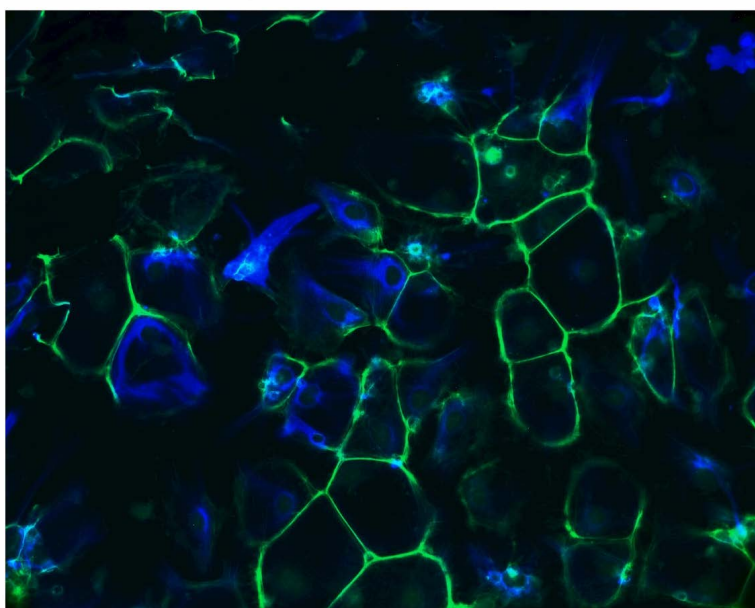

## Supplement 3.

**Figure S1.** Neural stem cells and primary neurons. Immunofluorescence staining.

D PR:  $\beta$ III tubulin

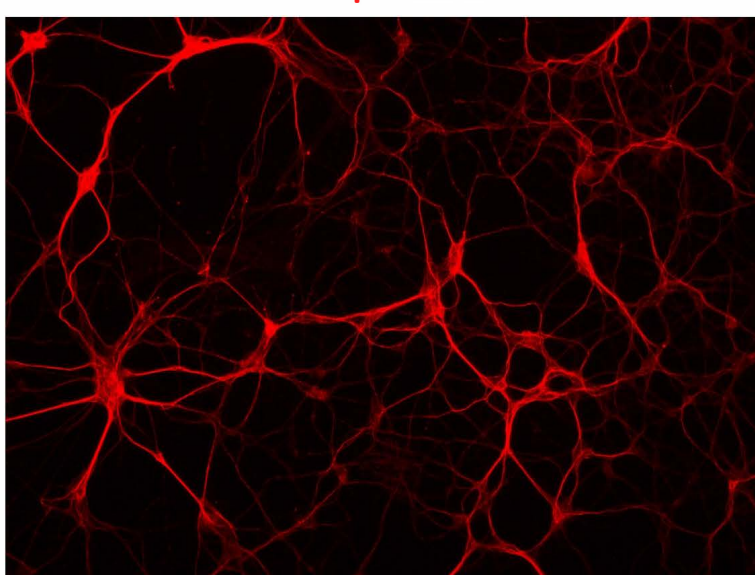

E PR: GFAP DAPI

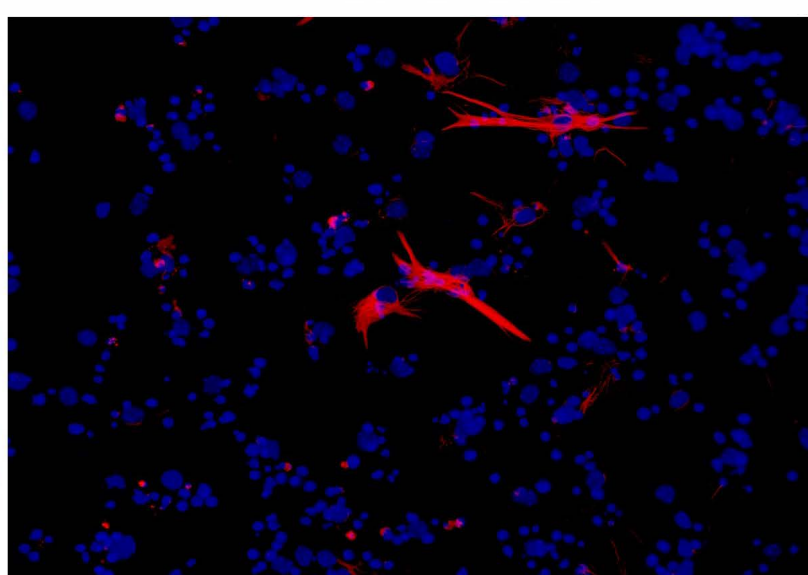

Supplement: s1 [file s1]
